# Supplementary material for: Functional Genomics Unique to Week 20 Post Wounding in the Deep Cone/Fat Dome of the Duroc/Yorkshire Porcine Model of Fibroproliferative Scarring
Source: PLoS One. 2011 Apr 20;6(4):e19024. doi: 10.1371/journal.pone.0019024 (PMC3080398; doi:10.1371/journal.pone.0019024)
Supplement: Table S3 — Gene Sets Uniquely Significant at Week 20. (XLS) [file pone.0019024.s003.xls]

## Sheet: sets for paper
Table S3 – Gene Sets Uniquely Significant at Week 20
Gene Sets	Brief Explanation	Collagen Genes	p-value	Molecules
ADIP_HUMAN_DN	Down-regulated in primary human adipocytes, versus preadipocytes	3A1, 6A3	.000	COL3A1, COL6A3, DCN, FN1, LUM, SNN, SPARC, THBS2
ADIPOGENESIS_HMSC_ CLASS2_UP	Up-regulated 1-14 days following the differentiation of human bone marrow mesenchymal stem cells (hMSC) into adipocytes, versus untreated hMSC cells (Class II)	6A3	.000	COL6A3, GADD45B, IRS2, LIFR, NFIL3, PIK3R1, TGFBR3
APOPTOSIS	blank		.000	BCL2L11, BIRC2, BIRC5, BNIP3L, CASP2, CASP4, CYCS, JUN, LTA, MAP3K1, RELA, TNFRSF1A, TNFRSF1B, TP53
HSA04510_FOCAL_ ADHESION	Genes involved in focal adhesion	1A1, 2A1, 3A1, 4A1, 4A4, 5A1, 5A2, 5A3, 6A3, 11A1	.000	ACTG1, ACTN1, AKT1, AKT3, ARHGAP5, BIRC2, CAPN2, CAV1, CAV2, CDC42, COL11A1, COL1A1, COL1A2, COL2A1, COL3A1, COL4A1, COL4A4, COL5A1, COL5A2, COL5A3, COL6A3, CTNNB1, FN1, GRB2, GRLF1, GSK3B, IBSP, IGF1, IGF1R, ITGA2, ITGA2B, ITGA6, ITGA7, ITGA9, ITGAV, ITGB1, ITGB5, ITGB6, ITGB8, JUN, LAMA1, LAMA2, LAMA4, LAMA5, LAMB1, LAMB2, LAMC1, MAPK8, MAPK9, MET, MYL7, MYLK, MYLPF, PAK1, PDGFA, PDGFC, PDGFD, …
HSA04512_ECM_ RECEPTOR_ INTERACTION	Genes involved in ECM-receptor interaction	1A1, 2A1, 3A1, 4A1, 4A4, 5A1, 5A2, 5A3, 6A3, 11A1	.000	CD44, CD47, COL11A1, COL1A1, COL1A2, COL2A1, COL3A1, COL4A1, COL4A4, COL5A1, COL5A2, COL5A3, COL6A3, DAG1, FN1, FNDC3A, GP9, HSPG2, IBSP, ITGA2, ITGA2B, ITGA6, ITGA7, ITGA9, ITGAV, ITGB1, ITGB5, ITGB6, ITGB8, LAMA1, LAMA2, LAMA4, LAMA5, LAMB1, LAMB2, LAMC1, SDC2, SDC3, SV2A, THBS1, THBS2, VTN
HSA04664_FC_EPSILON_RI_SIGNALING_ PATHWAY	Genes involved in Fc epsilon RI signaling pathway		.000	AKT1, AKT3, FCER1A, FCER1G, GRB2, KRAS, MAPK8, MAPK9, NRAS, PIK3R1, PLA2G10, PLA2G12B, PRKCA, RAC1, SOS1, VAV1
TGFBETA_C1_UP	Upregulated by TGF-beta treatment of skin fibroblasts, cluster 1		.000	ADAM9, CD44, HSPG2, IGFBP3, NID1, NOTCH2, PAK1, RHOB, SPARC
TGFBETA_EARLY_UP	Upregulated by TGF-beta treatment of skin fibroblasts at 30 min (clusters 1-3)	1A2, 3A1, 6A3	.000	ADAM9, CD44, CDH6, COL1A2, COL3A1, COL6A3, FN1, HSPG2, IGF2R, IGFBP2, IGFBP3, IGFBP5, ITGB5, LAMA4, NID1, NOTCH2, PAK1, RHOA, RHOB, RHOQ, SPARC, ZYX
